# Supplementary material for: Association between Dietary Patterns and Metabolic Syndrome Risk Factors: A Cross-Sectional Study of Christian Orthodox Church Fasters and Non-Fasters in Greece
Source: MDPI journal article supplement (doi:10.3390/foods12183488), 2023-09-19
Supplement: s1 [file s1]

## Supplementary Tables

**Table S1.** Demographic & lifestyle characteristics, and prevalence of metabolic syndrome and its components.

| Variable                                     | Fasters (n=200) |      | Non-fasters (n=200) |      | p-value |
|----------------------------------------------|-----------------|------|---------------------|------|---------|
|                                              | n               | %    | n                   | %    |         |
| <b>Sex</b>                                   |                 |      |                     |      | 0.60    |
| Male                                         | 69              | 34.5 | 74                  | 37.0 |         |
| Female                                       | 131             | 65.5 | 126                 | 63.0 |         |
| <b>Education level</b>                       |                 |      |                     |      | 0.17    |
| Primary education                            | 9               | 4.5  | 17                  | 8.5  |         |
| Secondary education                          | 51              | 25.5 | 54                  | 27.0 |         |
| Tertiary education                           | 113             | 56.5 | 104                 | 52.0 |         |
| Master's/Doctoral                            | 27              | 13.5 | 25                  | 12.5 |         |
| <b>Marital status</b>                        |                 |      |                     |      | 0.67    |
| Single                                       | 88              | 44.0 | 94                  | 47.0 |         |
| Married/ Living together                     | 108             | 54.0 | 96                  | 48.0 |         |
| Divorced                                     | 4               | 2.0  | 5                   | 2.5  |         |
| Widowed                                      | -               |      | 5                   | 2.5  |         |
| <b>Smoking status</b>                        |                 |      |                     |      | 0.000   |
| Yes                                          | 11              | 5.5  | 58                  | 71.0 |         |
| No – never                                   | 183             | 91.5 | 142                 | 29.0 |         |
| No – quit smoking                            | 6               | 3.0  | -                   |      |         |
| <b>Body Mass Index status</b>                |                 |      |                     |      | 0.15    |
| Underweight (<18.5 kg/m <sup>2</sup> )       | -               |      | 2                   | 1.0  |         |
| Normal weight (18.5-24.9 kg/m <sup>2</sup> ) | 79              | 39.5 | 91                  | 45.5 |         |
| Overweight (25-29.9 kg/m <sup>2</sup> )      | 76              | 38.0 | 68                  | 34.0 |         |
| Obesity (≥30 kg/m <sup>2</sup> )             | 45              | 22.5 | 39                  | 19.5 |         |
| <b>Supplement status</b>                     |                 |      |                     |      | 0.71    |
| Yes                                          | 43              | 21.5 | 40                  | 20.0 |         |
| No                                           | 157             | 78.5 | 160                 | 80.0 |         |
| <b>Way of eating</b>                         |                 |      |                     |      | 0.004   |
| Anxious                                      | 7               | 3.5  | 4                   | 2.0  |         |
| Slowly                                       | 77              | 38.5 | 98                  | 49.0 |         |
| Quickly                                      | 75              | 37.5 | 85                  | 42.5 |         |
| Regular                                      | 41              | 20.5 | 13                  | 6.5  |         |
| <b>Way of eating - company</b>               |                 |      |                     |      | 0.11    |
| Sitting alone                                | 48              | 24.0 | 47                  | 23.5 |         |
| Sitting with someone                         | 145             | 42.5 | 130                 | 65.0 |         |
| In front of a TV/computer                    | 7               | 3.5  | 23                  | 11.5 |         |
| <b>Way of cooking</b>                        |                 |      |                     |      | 0.47    |
| Boiled                                       | 51              | 25.5 | 46                  | 23.0 |         |
| Fried                                        | 117             | 58.5 | 122                 | 61.0 |         |
| Grilled/oven                                 | 23              | 11.5 | 29                  | 14.5 |         |

|                                                                     |                  |      |                  |      |                |
|---------------------------------------------------------------------|------------------|------|------------------|------|----------------|
| Mixed methods                                                       | 4                | 2.0  | 3                | 1.5  |                |
| <b>Use of salt apart of cooking process</b>                         |                  |      |                  |      | 0.17           |
| Yes                                                                 | 58               | 29.0 | 46               | 23.0 |                |
| No                                                                  | 142              | 71.0 | 154              | 77.0 |                |
| <b>Use of diet products</b>                                         |                  |      |                  |      | 0.002          |
| Yes                                                                 | 36               | 18.0 | 62               | 31.0 |                |
| No                                                                  | 164              | 82.0 | 138              | 69.0 |                |
| <b>Physical activity level/status</b>                               |                  |      |                  |      | 0.06           |
| Extremely low ( <i>never/rarely</i> )                               | 12               | 6.0  | 27               | 13.5 |                |
| Low (<2 <i>times per week</i> )                                     | 57               | 28.5 | 53               | 26.5 |                |
| Moderate (2-3 <i>times per week</i> )                               | 98               | 49.0 | 94               | 47.0 |                |
| High (3-5 <i>times per week</i> )                                   | 30               | 15.0 | 22               | 11.0 |                |
| Extremely high ( <i>everyday</i> )                                  | 3                | 1.5  | 4                | 2.0  |                |
| <b>Free time workout</b>                                            |                  |      |                  |      | 0.26           |
| Yes                                                                 | 74               | 37.0 | 85               | 42.5 |                |
| No                                                                  | 126              | 63.0 | 115              | 57.5 |                |
|                                                                     | <b>Mean ± SD</b> |      | <b>Mean ± SD</b> |      | <b>p-value</b> |
| <b>Age (years)</b>                                                  | 43.4 ± 16.7      |      | 41.9 ± 17.3      |      | 0.40           |
| <b>WC &gt;102cm for men or &gt;88cm for women</b>                   | 81 (40.5)        |      | 68 (34)          |      | 0.18           |
| <b>FBG ≥100mg/dL</b>                                                | 13 (6.5)         |      | 28 (14.0)        |      | 0.013          |
| <b>HDL cholesterol &lt;40mg/dL for men or &lt;50mg/dL for women</b> | 62 (31.0)        |      | 56 (28)          |      | 0.51           |
| <b>TRG ≥150mg/dL</b>                                                | 63 (31.5)        |      | 71 (35.5)        |      | 0.39           |
| <b>BP ≥130/85mmHg</b>                                               | 34 (17.0)        |      | 67 (33.5)        |      | <0.001         |
| <b>MetS prevalence</b>                                              | 31 (15.5)        |      | 42 (21.0)        |      | 0.15           |

SD: Standard Deviation, WC: Waist Circumference, FBG: Fasting Blood Glucose, HDL: High Density Lipoprotein, TRG: Triglycerides, BP: Blood Pressure, MetS: Metabolic Syndrome.

**Table S2.** Details of the food items included in each of the 61 food groups for the principal component analysis.

| a/a | Food groups    | Original food(s) from the FFQ |
|-----|----------------|-------------------------------|
| 1   | Red meat       | Pork                          |
|     |                | Beef                          |
|     |                | Lamb and goat                 |
| 2   | White meat     | Chicken                       |
|     |                | Rabbit                        |
|     |                | Turkey                        |
| 3   | Processed meat | Sausage pork                  |
|     |                | Sausage turkey                |
| 4   | Fish fresh     | Fish fresh                    |

|    |                               |                                                         |
|----|-------------------------------|---------------------------------------------------------|
| 5  | Fish canned                   | Fish canned                                             |
|    |                               | Fish salty                                              |
| 6  | Seafood                       | Seafood                                                 |
|    |                               | Shellfish                                               |
|    |                               | Snail                                                   |
| 7  | Eggs                          | Egg                                                     |
| 8  | Soya products                 | Soya                                                    |
|    |                               | Cheese products from soya                               |
|    |                               | Milk products from soya                                 |
| 9  | Legumes                       | Legumes                                                 |
| 10 | Nuts                          | Nuts                                                    |
| 11 | Pastitsio and mousaka         | Pastitsio - mousaka                                     |
| 12 | Pies homemade                 | Pies homemade                                           |
| 13 | Pizza                         | Pizza                                                   |
| 14 | Vegetables homemade dishes    | Stuffed peppers grape leaves cabbage with rice and meat |
|    |                               | Stuffed peppers grape leaves cabbage spinach with rice  |
|    |                               | Vegetables cooked, ladera                               |
| 15 | Cheese full fat               | Cheese wholefat, feta, kasseri, kefalotiri              |
|    |                               | Cheese wholefat, graviera, parmezana                    |
| 16 | Cheese low fat                | Cheese 12% fat, mizithra, anthotiro                     |
|    |                               | Cheese lowfat, milner, fina                             |
|    |                               | Cheese lowfat, cottage                                  |
| 17 | Milk full fat                 | Milk goat                                               |
|    |                               | Milk fresh full fat 30.5%                               |
|    |                               | Milk condensed full fat                                 |
|    |                               | Milk choco beverage wholemilk                           |
| 18 | Milk low fat                  | Milk fresh low fat 10.5%                                |
|    |                               | Kefir & ariani                                          |
|    |                               | Milk fresh nonfat                                       |
|    |                               | Milk chocolate beverage nonfat                          |
| 19 | Yogurt full fat               | Yogurt goat                                             |
|    |                               | Yogurt cow full fat 10%                                 |
|    |                               | Yogurt dessert                                          |
| 20 | Yogurt low fat                | Yogurt cow low fat 2%                                   |
|    |                               | Yogurt cow nonfat                                       |
| 21 | White bread and products      | Bread white                                             |
|    |                               | Breadsticks                                             |
|    |                               | Bagel, koulouri                                         |
| 22 | Whole meal bread and products | Bread wholegrain                                        |
|    |                               | Breadsticks with seeds                                  |
| 23 | Rusks                         | Rusk traditional                                        |
|    |                               | Nut barley                                              |

|    |                                           |                               |
|----|-------------------------------------------|-------------------------------|
|    |                                           | Nut wheat                     |
|    |                                           | Rusk whole meal               |
|    |                                           | Rusk wheat                    |
| 24 | Salty bakery products                     | Bagel koulouri stuffed        |
| 25 | Other bread                               | Pita bread Cypriot            |
|    |                                           | Pita bread                    |
|    |                                           | Pita bread round              |
| 26 | Pasta, rice, and other white cereals      | Pasta white                   |
|    |                                           | Rice white                    |
|    |                                           | Traxana, couscous             |
| 27 | Pasta, rice, and other whole meal cereals | Pasta whole meal              |
|    |                                           | Rice whole meal               |
| 28 | Potatoes boiled                           | Potato boiled                 |
| 29 | Potatoes fried and roasted                | Potato fried                  |
|    |                                           | Potato roasted                |
| 30 | Wholegrain breakfast cereals and muesli   | Corn flakes whole meal        |
|    |                                           | Muesli oats                   |
| 31 | Other breakfast cereals                   | Corn flakes white             |
|    |                                           | Coco pops                     |
|    |                                           | Corn flakes with chocolate    |
| 32 | Cereal bar                                | Bars                          |
| 33 | Tahini and peanut butter spreads          | Tahini                        |
|    |                                           | Peanut butter                 |
| 34 | Sugar, honey and marmalade                | Sugar                         |
|    |                                           | Honey                         |
|    |                                           | Marmalade                     |
| 35 | Vegetables raw                            | Vegetable fresh               |
|    |                                           | Corn                          |
| 36 | Vegetables not raw                        | Vegetable boiled              |
|    |                                           | Vegetable pickled             |
| 37 | Fruits                                    | Fruit fresh                   |
|    |                                           | Fruit canned                  |
|    |                                           | Fruit dried                   |
| 38 | Fruit juices                              | Fruit juice fresh             |
|    |                                           | Fruit juice canned            |
| 39 | Soft drinks with sugar                    | Lemonade/orangeade with sugar |
|    |                                           | Fizzy drink cola with sugar   |
|    |                                           | Fizzy drink with sugar other  |
| 40 | Soft drinks without sugar                 | Fizzy drink cola light zero   |
|    |                                           | Fizzy drink light other       |
| 41 | Energy drinks                             | Energy drinks                 |
|    |                                           | Isotonic drinks               |

|    |                            |                                             |
|----|----------------------------|---------------------------------------------|
| 42 | Butter                     | Butter                                      |
| 43 | Other fat spreads          | Margarine                                   |
|    |                            | Becel                                       |
| 44 | Olive oil and olives       | Olive oil                                   |
|    |                            | Olive                                       |
| 45 | Other oils                 | Oilseed, sporelaio                          |
| 46 | Salad dressings and dips   | Mayonnaise                                  |
|    |                            | Mayonnaise light                            |
|    |                            | Ketchup                                     |
|    |                            | Mustard                                     |
|    |                            | Tarama                                      |
|    |                            | Salad dip, tirokauteri, melitzanosalata     |
| 47 | Coffee                     | Coffee nescafe, filtered, espresso          |
|    |                            | Coffee greek                                |
| 48 | Cacao and chocolate powder | Cacao powder                                |
|    |                            | Chocolate powder or beverage                |
| 49 | Tea                        | Tea green                                   |
|    |                            | Tea black                                   |
|    |                            | Tea herbal traditional                      |
| 50 | Wine                       | Wine                                        |
| 51 | Beer                       | Beer                                        |
| 52 | Ouzo, raki and tsipouro    | Ouzo, raki, tsipouro                        |
| 53 | Liquor                     | Spirit beverages                            |
| 54 | Water                      | Water                                       |
| 55 | Savoury snacks             | Chips potato                                |
| 56 | Puddings                   | Pudding milk or rice full fat               |
| 57 | Traditional confectionery  | Donut loukoumas                             |
|    |                            | Dessert homemade, dessert spoon (koutaliou) |
| 58 | Chocolate confectionery    | Dessert with chocolate                      |
|    |                            | Chocolates                                  |
| 59 | Biscuits & cakes           | Biscuits cake plain                         |
|    |                            | Biscuits cake with chocolate                |
| 60 | Nougat & halvah            | Nougat                                      |
|    |                            | Nougat with nuts                            |
|    |                            | Halvah tahini                               |
|    |                            | Halvah semolina                             |
| 61 | Ice cream                  | Ice cream                                   |

**Table S3.** Food groups and respective factor loadings in the dietary patterns of all study participants (n=400).

| <b>Food group(s) *</b>                  | <b>Western Diet pattern</b> | <b>Mediterranean-like Diet pattern</b> | <b>Plant-based/Fasting Diet pattern</b> |
|-----------------------------------------|-----------------------------|----------------------------------------|-----------------------------------------|
|                                         | Variance explained 7.2%     | Variance explained 5.6%                | Variance explained 4.7%                 |
| Beer                                    | 0.071                       | 0.419                                  | -0.107                                  |
| Biscuits and cakes                      | 0.390                       | -0.071                                 | 0.054                                   |
| Butter                                  | 0.249                       | 0.104                                  | 0.173                                   |
| Cacao and chocolate powder              | 0.378                       | 0.152                                  | 0.132                                   |
| Cereal bar                              | 0.170                       | 0.409                                  | 0.121                                   |
| Cheese full fat                         | 0.163                       | -0.110                                 | 0.220                                   |
| Cheese low fat                          | 0.009                       | 0.373                                  | 0.149                                   |
| Chocolate confectionery                 | 0.260                       | -0.012                                 | -0.022                                  |
| Coffee                                  | -0.247                      | 0.301                                  | 0.133                                   |
| Eggs                                    | 0.041                       | -0.013                                 | 0.179                                   |
| Energy drinks                           | 0.257                       | 0.192                                  | -0.067                                  |
| Fish canned                             | 0.056                       | 0.155                                  | 0.199                                   |
| Fresh fish                              | 0.017                       | 0.007                                  | 0.220                                   |
| Fruit juices                            | 0.443                       | 0.134                                  | -0.016                                  |
| Fruits                                  | -0.131                      | -0.016                                 | 0.627                                   |
| Ice-cream                               | 0.404                       | -0.028                                 | 0.070                                   |
| Legumes                                 | 0.246                       | -0.055                                 | 0.103                                   |
| Liquor                                  | 0.043                       | 0.493                                  | -0.099                                  |
| Milk full fat                           | 0.505                       | -0.099                                 | 0.074                                   |
| Milk low fat                            | -0.004                      | 0.566                                  | -0.043                                  |
| Nougat halva                            | 0.233                       | 0.052                                  | 0.443                                   |
| Nuts                                    | -0.011                      | 0.096                                  | 0.435                                   |
| Olive oil olives                        | -0.257                      | 0.096                                  | 0.450                                   |
| Other bread                             | 0.498                       | 0.279                                  | 0.062                                   |
| Other breakfast cereals                 | 0.278                       | 0.419                                  | -0.050                                  |
| Other fat spreads                       | 0.128                       | -0.041                                 | -0.068                                  |
| Other oils                              | 0.370                       | -0.205                                 | 0.128                                   |
| Other seafood                           | 0.162                       | 0.052                                  | 0.337                                   |
| Pasta rice and other white cereals      | 0.293                       | 0.004                                  | 0.173                                   |
| Pasta rice and other wholegrain cereals | 0.148                       | 0.253                                  | 0.102                                   |
| Pastitsio                               | 0.415                       | 0.036                                  | 0.018                                   |
| Pies                                    | 0.045                       | -0.051                                 | 0.082                                   |
| Pizza                                   | 0.385                       | 0.152                                  | -0.009                                  |
| Potatoes boiled                         | 0.087                       | 0.193                                  | 0.030                                   |
| Potatoes other                          | 0.351                       | 0.043                                  | -0.122                                  |

|                               |        |        |        |
|-------------------------------|--------|--------|--------|
| Processed meat                | 0.317  | 0.244  | -0.312 |
| Puddings                      | 0.466  | 0.248  | -0.045 |
| Red meat                      | 0.121  | 0.161  | -0.106 |
| Rusks                         | -0.018 | 0.318  | 0.243  |
| Salad dressings dips          | 0.570  | 0.240  | -0.069 |
| Salty bakery products         | 0.306  | 0.216  | -0.031 |
| Savoury snacks                | 0.403  | 0.201  | -0.104 |
| Soft drinks with sugar        | 0.457  | 0.144  | -0.276 |
| Soft drinks without sugar     | 0.226  | 0.414  | -0.170 |
| Soya products                 | 0.190  | -0.154 | 0.130  |
| Sugar honey marmalade         | 0.293  | -0.064 | 0.102  |
| Tahini and spreads            | -0.006 | -0.137 | 0.393  |
| Tea                           | 0.176  | 0.093  | 0.293  |
| Traditional confectionery     | 0.381  | -0.065 | 0.287  |
| Traditional spirits           | -0.107 | 0.396  | 0.068  |
| Vegetables homemade dishes    | 0.142  | 0.081  | 0.324  |
| Vegetables not raw            | -0.182 | -0.034 | 0.414  |
| Vegetables raw                | -0.062 | 0.215  | 0.303  |
| Water                         | -0.046 | 0.034  | 0.151  |
| White bread and products      | 0.271  | -0.002 | 0.120  |
| White meat                    | 0.231  | 0.214  | -0.131 |
| Wholegrain breakfast cereals  | 0.101  | 0.480  | 0.256  |
| Wholegrain bread and products | -0.314 | 0.368  | 0.336  |
| Wine                          | -0.083 | 0.432  | -0.044 |
| Yogurt full fat               | 0.303  | -0.152 | 0.321  |
| Yogurt low fat                | -0.225 | 0.463  | 0.138  |

*\*Foods that have the highest factor loadings  $\geq 0.3$  and those between 0.25 to 0.3, are positive related to the dietary pattern. Foods with low factor loadings for the dietary pattern, and therefore less likely to be part of that pattern, are between -0.25 and -0.3 and  $\leq -0.3$ .*

**Table S4.** Food groups and respective factor loadings in the dietary patterns in men (n=143).

| Food group(s) *            | Western Diet pattern    | Mediterranean-like Diet pattern |
|----------------------------|-------------------------|---------------------------------|
|                            | Variance explained 8.7% | Variance explained 6.4%         |
| Beer                       | 0.342                   | 0.106                           |
| Biscuits and cakes         | 0.416                   | -0.106                          |
| Butter                     | 0.529                   | -0.022                          |
| Cacao and chocolate powder | 0.460                   | 0.204                           |
| Cereal bar                 | 0.109                   | 0.384                           |
| Cheese full fat            | 0.218                   | 0.069                           |

|                                         |        |        |
|-----------------------------------------|--------|--------|
| Cheese low fat                          | 0.167  | 0.324  |
| Chocolate confectionery                 | 0.228  | -0.132 |
| Coffee                                  | -0.108 | 0.287  |
| Eggs                                    | -0.047 | 0.130  |
| Energy drinks                           | 0.323  | -0.029 |
| Fish canned                             | 0.257  | 0.194  |
| Fresh fish                              | 0.149  | 0.340  |
| Fruit juices                            | 0.448  | 0.087  |
| Fruits                                  | -0.072 | 0.681  |
| Ice-cream                               | 0.216  | 0.047  |
| Legumes                                 | -0.028 | 0.080  |
| Liquor                                  | 0.333  | 0.137  |
| Milk full fat                           | 0.470  | -0.137 |
| Milk low fat                            | 0.142  | 0.372  |
| Nougat halva                            | 0.254  | 0.285  |
| Nuts                                    | -0.012 | 0.440  |
| Olive oil olives                        | 0.047  | 0.497  |
| Other bread                             | 0.606  | -0.054 |
| Other breakfast cereals                 | 0.312  | 0.140  |
| Other fat spreads                       | 0.186  | -0.285 |
| Other oils                              | 0.385  | -0.208 |
| Other seafood                           | 0.224  | 0.249  |
| Pasta rice and other white cereals      | 0.315  | 0.055  |
| Pasta rice and other whole meal cereals | 0.299  | 0.275  |
| Pastitsio                               | 0.321  | -0.103 |
| Pies                                    | 0.147  | -0.005 |
| Pizza                                   | 0.298  | 0.058  |
| Potatoes boiled                         | 0.224  | 0.182  |
| Potatoes other                          | 0.320  | -0.259 |
| Processed meat                          | 0.363  | -0.247 |
| Puddings                                | 0.459  | -0.227 |
| Red meat                                | 0.154  | -0.032 |
| Rusks                                   | 0.001  | 0.488  |
| Salad dressings dips                    | 0.472  | -0.064 |
| Salty bakery products                   | 0.483  | 0.074  |
| Savoury snacks                          | 0.515  | 0.072  |
| Soft drinks with sugar                  | 0.616  | -0.210 |
| Soft drinks without sugar               | 0.465  | 0.071  |
| Soya products                           | 0.130  | 0.061  |
| Sugar honey marmalade                   | 0.223  | -0.060 |
| Tahini and spreads                      | -0.110 | 0.102  |
| Tea                                     | 0.184  | 0.185  |



|                               |        |        |
|-------------------------------|--------|--------|
| Traditional confectionery     | 0.342  | 0.167  |
| Traditional spirits           | 0.139  | 0.179  |
| Vegetables homemade dishes    | 0.161  | 0.289  |
| Vegetables not raw            | -0.130 | 0.307  |
| Vegetables raw                | -0.068 | 0.432  |
| Water                         | -0.031 | 0.237  |
| White bread and products      | 0.359  | 0.051  |
| White meat                    | 0.092  | -0.065 |
| Wholegrain breakfast cereals  | 0.278  | 0.386  |
| Wholegrain bread and products | 0.010  | 0.616  |
| Wine                          | 0.040  | 0.220  |
| Yogurt full fat               | 0.278  | 0.104  |
| Yogurt low fat                | -0.043 | 0.489  |

*\*Foods that have the highest factor loadings  $\geq 0.3$  and those between 0.25 to 0.3, are positive related to the dietary pattern. Foods with low factor loadings for the dietary pattern, and therefore less likely to be part of that pattern, are between -0.25 and -0.3 and  $\leq -0.3$ .*

**Table S5.** Food groups and respective factor loadings in the dietary patterns in women (n=257).

| <b>Food group(s) *</b>     | <b>Western Diet pattern</b> | <b>Mediterranean-like Diet pattern</b> |
|----------------------------|-----------------------------|----------------------------------------|
|                            | Variance explained 7.5%     | Variance explained 5.7%                |
| Beer                       | -0.010                      | 0.405                                  |
| Biscuits and cakes         | 0.312                       | -0.104                                 |
| Butter                     | 0.142                       | 0.085                                  |
| Cacao and chocolate powder | 0.322                       | 0.050                                  |
| Cereal bar                 | 0.264                       | 0.465                                  |
| Cheese full fat            | 0.103                       | -0.129                                 |
| Cheese low fat             | 0.034                       | 0.401                                  |
| Chocolate confectionery    | 0.247                       | -0.043                                 |
| Coffee                     | -0.260                      | 0.370                                  |
| Eggs                       | 0.065                       | -0.076                                 |
| Energy drinks              | 0.235                       | 0.168                                  |
| Fish canned                | -0.030                      | 0.243                                  |
| Fresh fish                 | -0.042                      | -0.126                                 |
| Fruit juices               | 0.486                       | 0.043                                  |
| Fruits                     | -0.124                      | -0.121                                 |
| Ice-cream                  | 0.499                       | -0.064                                 |
| Legumes                    | 0.386                       | 0.034                                  |
| Liquor                     | -0.052                      | 0.486                                  |
| Milk full fat              | 0.456                       | -0.169                                 |

|                                         |        |        |
|-----------------------------------------|--------|--------|
| Milk low fat                            | 0.088  | 0.624  |
| Nougat halva                            | 0.254  | 0.059  |
| Nuts                                    | 0.038  | 0.036  |
| Olive oil olives                        | -0.344 | 0.064  |
| Other bread                             | 0.476  | 0.216  |
| Other breakfast cereals                 | 0.293  | 0.409  |
| Other fat spreads                       | 0.050  | 0.005  |
| Other oils                              | 0.308  | -0.225 |
| Other seafood                           | 0.155  | 0.015  |
| Pasta rice and other white cereals      | 0.282  | 0.004  |
| Pasta rice and other whole meal cereals | 0.154  | 0.138  |
| Pastitsio                               | 0.454  | 0.025  |
| Pies                                    | -0.066 | -0.084 |
| Pizza                                   | 0.422  | 0.078  |
| Potatoes boiled                         | 0.051  | 0.165  |
| Potatoes other                          | 0.365  | 0.049  |
| Processed meat                          | 0.349  | 0.278  |
| Puddings                                | 0.465  | 0.299  |
| Red meat                                | 0.162  | 0.190  |
| Rusks                                   | 0.116  | 0.322  |
| Salad dressings dips                    | 0.644  | 0.248  |
| Salty bakery products                   | 0.307  | 0.165  |
| Savoury snacks                          | 0.402  | 0.122  |
| Soft drinks with sugar                  | 0.388  | 0.055  |
| Soft drinks without sugar               | 0.153  | 0.352  |
| Soya products                           | 0.207  | -0.175 |
| Sugar honey marmalade                   | 0.250  | -0.041 |
| Tahini and spreads                      | -0.074 | -0.145 |
| Tea                                     | 0.139  | 0.064  |
| Traditional confectionery               | 0.361  | -0.039 |
| Traditional spirits                     | -0.182 | 0.416  |
| Vegetables homemade dishes              | 0.169  | -0.007 |
| Vegetables not raw                      | -0.237 | -0.064 |
| Vegetables raw                          | -0.015 | 0.203  |
| Water                                   | -0.033 | -0.006 |
| White bread and products                | 0.214  | -0.035 |
| White meat                              | 0.298  | 0.237  |
| Wholegrain breakfast cereals            | 0.069  | 0.448  |
| Wholegrain bread and products           | -0.350 | 0.332  |
| Wine                                    | -0.084 | 0.430  |
| Yogurt full fat                         | 0.266  | -0.156 |
| Yogurt low fat                          | -0.175 | 0.502  |

*\*Foods that have the highest factor loadings  $\geq 0.3$  and those between 0.25 to 0.3, are positive related to the dietary pattern. Foods with low factor loadings for the dietary pattern, and therefore less likely to be part of that pattern, are between -0.25 and -0.3 and  $\leq -0.3$ .*

**Table S6.** Questionnaire used in the cross-sectional study in Greek language.

|                                   |                                                                          |                                                                                               |
|-----------------------------------|--------------------------------------------------------------------------|-----------------------------------------------------------------------------------------------|
| <b>Code</b>                       | Κωδικός αριθμός                                                          |                                                                                               |
| <b>Date</b>                       | Ημερομηνία επανελέγχου (Μήνας/ΗΗ/ΕΕΕΕ)                                   |                                                                                               |
| <b>ΔΗΜΟΓΡΑΦΙΚΑ ΣΤΟΙΧΕΙΑ</b>       |                                                                          |                                                                                               |
| <b>Age</b>                        | Ποια είναι η ηλικία σας;                                                 | ...                                                                                           |
| <b>Sex</b>                        | Φύλο                                                                     | 1   Α<br>2   Γ                                                                                |
| <b>Occup</b>                      | Ποιο το επάγγελμα που ασκείτε τώρα (τελευταίο έτος);                     | ...                                                                                           |
| <b>Marrital</b>                   | Οικογενειακή κατάσταση                                                   | 1   Άγαμος<br>2   Έγγαμος/Συζεί<br>3   Διαζευγμένος<br>4   Χήρος                              |
| <b>EDUC</b>                       | Σπουδές                                                                  | 1   Δημοτικό<br>2   Γυμνάσιο<br>3   Λύκειο<br>4   Πτυχιούχοι ΑΕΙ<br>5   Μεταπτυχιακές Σπουδές |
| <b>ΧΑΡΑΚΤΗΡΙΣΤΙΚΑ ΤΡΟΠΟΥ ΖΩΗΣ</b> |                                                                          |                                                                                               |
| <b>Smoking</b>                    | Είστε καπνιστής (περισσότερο από 1 τσιγάρα ημερησίως το τελευταίο έτος); | 1   ΝΑΙ<br>2   ΟΧΙ – Διέκοψα<br>0   ΟΧΙ – Δεν έχω καπνίσει ποτέ                               |
| <b>Sleep</b>                      | Πόσες ώρες ύπνου συμπληρώνετε την ημέρα;                                 |                                                                                               |

|                                                                                                                                                                                                                                                                                                                                                                                       |                                                                                                                                                                                                                                                                                                                                                                                                                               |  |
|---------------------------------------------------------------------------------------------------------------------------------------------------------------------------------------------------------------------------------------------------------------------------------------------------------------------------------------------------------------------------------------|-------------------------------------------------------------------------------------------------------------------------------------------------------------------------------------------------------------------------------------------------------------------------------------------------------------------------------------------------------------------------------------------------------------------------------|--|
| Κλίμακα IPAQ, Πηγή: Papathanasiou G, Georgoudis G, Papandreou M, Spyropoulos P, Georgakopoulos D, Kalfakakou V, Evangelou A. Reliability measures of the short International Physical Activity Questionnaire (IPAQ) in Greek young adults. Hellenic J Cardiol. 2009;50:283-94                                                                                                         |                                                                                                                                                                                                                                                                                                                                                                                                                               |  |
| IPAQ_1                                                                                                                                                                                                                                                                                                                                                                                | Κατά τη διάρκεια των τελευταίων 7 ημερών, πόσες μέρες κάνατε έντονη σωματική δραστηριότητα όπως σκάψιμο, έντονη άσκηση με βάρη, τρέξιμο σε διάδρομο με κλίση, αεροβική γυμναστική, γρήγορο τρέξιμο, γρήγορη ποδηλασία, γρήγορη κολύμβηση, τένις, αγώνες σε γήπεδο (ποδόσφαιρο, basketball, volleyball, handball);                                                                                                             |  |
| IPAQ_2                                                                                                                                                                                                                                                                                                                                                                                | Πόσο χρόνο (σε λεπτά) καταναλώσατε συνήθως κάνοντας έντονη σωματική δραστηριότητα σε μία από αυτές τις ημέρες;                                                                                                                                                                                                                                                                                                                |  |
| Πριν απαντήσετε στις ερωτήσεις 3 και 4 σκεφτείτε τις μέτριες έντασης δραστηριότητες που κάνατε τις τελευταίες 7 ημέρες. Μια μέτρια έντασης δραστηριότητα αναφέρεται σε δραστηριότητες που απαιτούν μέτρια σωματική δραστηριότητα και σας κάνουν να αναπνέετε κάπως δυσκολότερα από ότι συνήθως. Σκεφτείτε μόνο τις δραστηριότητες που κάνατε και είχαν διάρκεια τουλάχιστον 10 λεπτά. |                                                                                                                                                                                                                                                                                                                                                                                                                               |  |
| IPAQ_3                                                                                                                                                                                                                                                                                                                                                                                | Κατά τη διάρκεια των τελευταίων 7 ημερών, πόσες μέρες κάνατε κάποια μέτρια σωματική δραστηριότητα όπως το να σηκώνετε και να μεταφέρετε ελαφρά βάρη (κάτω από 10 κιλά), συνολική καθαριότητα του σπιτιού, ήπιες ρυθμικές ασκήσεις σώματος, ποδηλασία αναψυχής με χαμηλή ταχύτητα, χαλαρή κολύμβηση σε μέτρια ένταση. Μη συμπεριλάβετε το περπάτημα. Να αναφερθούν μόνο οι δραστηριότητες που κάνατε για τουλάχιστον 10 λεπτά. |  |
| IPAQ_4                                                                                                                                                                                                                                                                                                                                                                                | Πόσο χρόνο (σε λεπτά) καταναλώσατε συνήθως κάνοντας σωματική δραστηριότητα μέτριας έντασης σε μία από αυτές τις ημέρες;                                                                                                                                                                                                                                                                                                       |  |
| IPAQ_5                                                                                                                                                                                                                                                                                                                                                                                | Κατά τη διάρκεια των τελευταίων 7 ημερών, πόσες ημέρες περπατήσατε για τουλάχιστον 10 λεπτά τη φορά;                                                                                                                                                                                                                                                                                                                          |  |
| IPAQ_6                                                                                                                                                                                                                                                                                                                                                                                | Πόσο χρόνο (σε λεπτά) καταναλώσατε συνήθως για περπάτημα σε μια από τις παραπάνω ημέρες;                                                                                                                                                                                                                                                                                                                                      |  |
| IPAQ_7                                                                                                                                                                                                                                                                                                                                                                                | Κατά τη διάρκεια των τελευταίων 7 ημερών, πόσο χρόνο (σε ώρες συνολικά) καταναλώσατε καθιστός στο σπίτι, στο γραφείο, με φίλους, ή διαβάζοντας, ξαπλώνοντας ή παρακολουθώντας τηλεόραση; Μην συμπεριλάβετε τις ώρες ύπνου.                                                                                                                                                                                                    |  |

| ΔΙΑΤΡΟΦΙΚΗ ΑΞΙΟΛΟΓΗΣΗ                                                                                                                                                                                                                                                                                                                                                                                                                        |                                                                                       |
|----------------------------------------------------------------------------------------------------------------------------------------------------------------------------------------------------------------------------------------------------------------------------------------------------------------------------------------------------------------------------------------------------------------------------------------------|---------------------------------------------------------------------------------------|
| 24hr                                                                                                                                                                                                                                                                                                                                                                                                                                         | Παρακαλώ συμβουλευτείτε τον ερευνητή για να συμπληρώσετε μαζί την 24ώρη ανάκλησή σας. |
|                                                                                                                                                                                                                                                                                                                                                                                                                                              | Κενός χώρος για καταγραφή 24ώρης ανάκλησης                                            |
| <p align="center"><b>ΕΡΩΤΗΜΑΤΟΛΟΓΙΟ ΣΥΧΝΟΤΗΤΑΣ ΚΑΤΑΝΑΛΩΣΗΣ ΤΡΟΦΙΜΩΝ</b></p> <p><b>Πηγή:</b> Bountziouka V, Bathrellou E, Giotopoulou A, Katsagoni C, Bonou M, Vallianou N, Barbetseas J, Avgerinos PC, Panagiotakos DB. Development, repeatability and validity regarding energy and macronutrient intake of a semi-quantitative food frequency questionnaire: methodological considerations. Nutr Metab Cardiovasc Dis. 2012;22:659-67.</p> |                                                                                       |

| Σημειώστε ΠΟΣΟ ΣΥΧΝΑ καταναλώσατε τα παρακάτω τρόφιμα τον <u>τελευταίο μήνα</u> . Προσοχή, θα πρέπει να απαντήσετε έχοντας ως <u>μερίδα αναφοράς την ποσότητα που αναγράφεται</u> στις παρενθέσεις. (Συντμήσεις: φ = φορές, γρ. = γραμμάρια, τμχ. = τεμάχιο, φλ. = φλιτζάνι τσαγιού = 240 ml) | 1  Ποτέ/ Σπάνια | 2  1-3 φ/ μήνα | 3  1-2 φ/ εβδομ. | 4  3-6 φ/ εβδομ. | 5  1 φ/ ημέρα | 6  ≥ 2 φ/ ημέρα |
|-----------------------------------------------------------------------------------------------------------------------------------------------------------------------------------------------------------------------------------------------------------------------------------------------|-----------------|----------------|------------------|------------------|---------------|-----------------|
| DQ_1 Γάλα/ γιαούρτι πλήρες (1 ποτήρι/ 1 κεσεδάκι)                                                                                                                                                                                                                                             | 1               | 2              | 3                | 4                | 5             | 6               |
| DQ_2 Γάλα/ γιαούρτι χαμηλό σε λιπαρά (1 ποτήρι/ 1 κεσεδάκι)                                                                                                                                                                                                                                   | 1               | 2              | 3                | 4                | 5             | 6               |
| DQ_3 Τυρί κίτρινο, τυρί σε κρέμα (30 γρ)                                                                                                                                                                                                                                                      | 1               | 2              | 3                | 4                | 5             | 6               |
| DQ_4 Τυρί φέτα, ανθότυρο (30 γρ)                                                                                                                                                                                                                                                              | 1               | 2              | 3                | 4                | 5             | 6               |
| DQ_5 Τυρί άπαχο ή χαμηλό σε λιπαρά (light, κότατζ) (30 γρ)                                                                                                                                                                                                                                    | 1               | 2              | 3                | 4                | 5             | 6               |
| DQ_6 Αυγό (βραστό, τηγανιτό, ομελέτα) (1 τμχ)                                                                                                                                                                                                                                                 | 1               | 2              | 3                | 4                | 5             | 6               |
| DQ_7 Ψωμί άσπρο (1 φέτα 30γρ ή φέτα τοστ), φρυγανιά (2 τμχ)                                                                                                                                                                                                                                   | 1               | 2              | 3                | 4                | 5             | 6               |
| DQ_8 Ψωμί ολικής αλέσεως (1 φέτα 30γρ ή φέτα τοστ), φρυγανιά (2 τμχ)                                                                                                                                                                                                                          | 1               | 2              | 3                | 4                | 5             | 6               |
| DQ_9 Κουλούρι Θεσ/κης, πίτα (σουβλάκι), ψωμάκια μπεργκερ (1 τμχ)                                                                                                                                                                                                                              | 1               | 2              | 3                | 4                | 5             | 6               |
| DQ_10 Κριτσίνια (2 λεπτά), παξιμάδια (1 μέτριο), κουλούρια (2 μέτρια)                                                                                                                                                                                                                         | 1               | 2              | 3                | 4                | 5             | 6               |
| DQ_11 Δημητριακά πρωινού (½ φλ), μπάρες δημητριακών (1 τμχ)                                                                                                                                                                                                                                   | 1               | 2              | 3                | 4                | 5             | 6               |
| DQ_12 Ρύζι λευκό (1 φλ)                                                                                                                                                                                                                                                                       | 1               | 2              | 3                | 4                | 5             | 6               |
| DQ_13 Ρύζι καστανό (1 φλ)                                                                                                                                                                                                                                                                     | 1               | 2              | 3                | 4                | 5             | 6               |
| DQ_14 Μακαρόνια, κριθαράκι, χυλοπίτες, άλλα ζυμαρικά (1 φλ)                                                                                                                                                                                                                                   | 1               | 2              | 3                | 4                | 5             | 6               |
| DQ_15 Ζυμαρικά ολικής αλέσεως (1 φλ)                                                                                                                                                                                                                                                          | 1               | 2              | 3                | 4                | 5             | 6               |
| DQ_16 Πατάτες βραστές, φούρνου, πουρές (1 μέτρια/ ½ φλ)                                                                                                                                                                                                                                       | 1               | 2              | 3                | 4                | 5             | 6               |

|                                                                 |   |   |   |   |   |   |
|-----------------------------------------------------------------|---|---|---|---|---|---|
| DQ_17 Πατάτες τηγανιτές (½ μερίδα εστιατορίου)                  | 1 | 2 | 3 | 4 | 5 | 6 |
| DQ_18 Μοσχάρι (μπριζόλα, κομμάτι) (150 γρ)                      | 1 | 2 | 3 | 4 | 5 | 6 |
| DQ_19 Μπιφτέκι (2 τμχ), κεφτεδάκια (4 τμχ), κιμάς (1 κουτάλα)   | 1 | 2 | 3 | 4 | 5 | 6 |
| DQ_20 Κοτόπουλο/ γαλοπούλα (όλα τα είδη) (150 γρ)               | 1 | 2 | 3 | 4 | 5 | 6 |
| DQ_21 Χοιρινό (μπριζόλα, κομμάτι, σουβλάκι) (150 γρ)            | 1 | 2 | 3 | 4 | 5 | 6 |
| DQ_22 Πίτσα (1 κομμάτι,)                                        | 1 | 2 | 3 | 4 | 5 | 6 |
| DQ_23 Γύρος (100 γρ)                                            | 1 | 2 | 3 | 4 | 5 | 6 |
| DQ_24 Αρνί, κατσίκι, κυνήγι, παϊδάκια (150 γρ)                  | 1 | 2 | 3 | 4 | 5 | 6 |
| DQ_25 Αλλαντικά (1 φέτα)                                        | 1 | 2 | 3 | 4 | 5 | 6 |
| DQ_26 Λουκάνικα (1 μέτριο), μπέικον (2 φέτες)                   | 1 | 2 | 3 | 4 | 5 | 6 |
| DQ_27 Αλλαντικά/ κρεατοσκευάσματα άπαχα ή light (όπως παραπάνω) | 1 | 2 | 3 | 4 | 5 | 6 |
| DQ_28 Ψάρια μικρά (150 γρ)                                      | 1 | 2 | 3 | 4 | 5 | 6 |
| DQ_29 Ψάρια μεγάλα (150 γρ)                                     | 1 | 2 | 3 | 4 | 5 | 6 |
| DQ_30 Θαλασσινά (χταπόδι, καλαμάρι, γαρίδες) (150 γρ)           | 1 | 2 | 3 | 4 | 5 | 6 |
| DQ_31 Όσπρια (π.χ. φακές, φασόλια, ρεβίθια) (1 πιάτο)           | 1 | 2 | 3 | 4 | 5 | 6 |
| DQ_32 Σπανακόρυζο/ λαχανόρυζο (1 πιάτο), γεμιστά (2 μέτρια)     | 1 | 2 | 3 | 4 | 5 | 6 |
| DQ_33 Παστίσιο, μουςακάς, παπουτσάκια (1 μερίδα = 150 γρ)       | 1 | 2 | 3 | 4 | 5 | 6 |
| DQ_34 Αρακάς, φασολάκια, μπάμιες, αγκινάρες (1 πιάτο)           | 1 | 2 | 3 | 4 | 5 | 6 |
| DQ_35 Τομάτα, αγγούρι, καρότο, πιπεριά (1 φλ. ωμά)              | 1 | 2 | 3 | 4 | 5 | 6 |

|                                                                         |   |   |   |   |   |   |
|-------------------------------------------------------------------------|---|---|---|---|---|---|
| DQ_36 Μαρούλι, λάχανο, σπανάκι, ρόκα (1 φλ. ωμά)                        | 1 | 2 | 3 | 4 | 5 | 6 |
| DQ_37 Μπρόκολο, κουνουπίδι, κολοκυθάκια, (½ φλ. βραστά)                 | 1 | 2 | 3 | 4 | 5 | 6 |
| DQ_38 Χόρτα, πράσο, σπανάκι, σέλινο (½ φλ. βραστά)                      | 1 | 2 | 3 | 4 | 5 | 6 |
| DQ_39 Πορτοκάλι (1 μέτριο)                                              | 1 | 2 | 3 | 4 | 5 | 6 |
| DQ_40 Μήλο, αχλάδι (1 μέτριο)                                           | 1 | 2 | 3 | 4 | 5 | 6 |
| DQ_41 Άλλα χειμερινά φρούτα (1 ολόκληρο ή ½ φλ)                         | 1 | 2 | 3 | 4 | 5 | 6 |
| DQ_42 Μπανάνα (1 μέτρια)                                                | 1 | 2 | 3 | 4 | 5 | 6 |
| DQ_43 Άλλα καλοκαιρινά φρούτα (1 ολόκληρο ή ½ φλ)                       | 1 | 2 | 3 | 4 | 5 | 6 |
| DQ_44 Χυμός φρούτων (1 ποτήρι)                                          | 1 | 2 | 3 | 4 | 5 | 6 |
| DQ_45 Αποξηραμένα φρούτα (¼ φλ.)                                        | 1 | 2 | 3 | 4 | 5 | 6 |
| DQ_46 Ξηροί καρποί, σπόροι (1 φλιτζανάκι καφέ)                          | 1 | 2 | 3 | 4 | 5 | 6 |
| DQ_47 Πίτες σπιτικές (π.χ. τυρόπιτα, σπανακόπιτα) (1 κομμάτι)           | 1 | 2 | 3 | 4 | 5 | 6 |
| DQ_48 Πίτες έτοιμες (1 κομμάτι)                                         | 1 | 2 | 3 | 4 | 5 | 6 |
| DQ_49 Τοστ, σάντουιτς (1 ολόκληρο)                                      | 1 | 2 | 3 | 4 | 5 | 6 |
| DQ_50 Γλυκά ταψιού (1 τμχ)                                              | 1 | 2 | 3 | 4 | 5 | 6 |
| DQ_51 Γλυκά κουταλιού, κομπόστα, ζελέ (1 μερίδα)                        | 1 | 2 | 3 | 4 | 5 | 6 |
| DQ_52 Πάστες, τάρτα (1 τμχ)                                             | 1 | 2 | 3 | 4 | 5 | 6 |
| DQ_53 Κρουασάν (1), γκοφρέτες (1 μέτρια), κέικ (1 φέτα), μπισκότα (3-4) | 1 | 2 | 3 | 4 | 5 | 6 |
| DQ_54 Σοκολάτα (όλα τα είδη) (1 μέτρια ~ 60 γρ)                         | 1 | 2 | 3 | 4 | 5 | 6 |
| DQ_55 Παγωτό, μιλκ σέικ, κρέμα, ρυζόγαλο (1 τμχ)                        | 1 | 2 | 3 | 4 | 5 | 6 |
| DQ_56 Πατατάκια, γαριδάκια, ποπ κορν (1 σακουλάκι ~70 γρ)               | 1 | 2 | 3 | 4 | 5 | 6 |

|                                                                         |   |   |   |   |   |   |
|-------------------------------------------------------------------------|---|---|---|---|---|---|
| DQ_57 Μέλι, μαρμελάδα, ζάχαρη (π.χ. σε ψωμί, καφέ)<br>(1 κουτ. γλυκού)  | 1 | 2 | 3 | 4 | 5 | 6 |
| DQ_58 Ελιές (10 μικρές/ 5 μεγάλες)                                      | 1 | 2 | 3 | 4 | 5 | 6 |
| DQ_59 Μαγιονέζα, σως (1 κουτ. σούπας)                                   | 1 | 2 | 3 | 4 | 5 | 6 |
| DQ_60 Μαγιονέζα/ σως λάιτ (1 κουτ. σούπας)                              | 1 | 2 | 3 | 4 | 5 | 6 |
| DQ_61 Πόσες φορές χρησιμοποιείτε ελαιόλαδο<br>(οπουδήποτε);             | 1 | 2 | 3 | 4 | 5 | 6 |
| DQ_62 Πόσες φορές χρησιμοποιείτε σπορέλαιο<br>(οπουδήποτε);             | 1 | 2 | 3 | 4 | 5 | 6 |
| DQ_63 Πόσες φορές χρησιμοποιείτε μαργαρίνη<br>(οπουδήποτε);             | 1 | 2 | 3 | 4 | 5 | 6 |
| DQ_64 Πόσες φορές χρησιμοποιείτε βούτυρο<br>(οπουδήποτε);               | 1 | 2 | 3 | 4 | 5 | 6 |
| DQ_65 Κρασί (1 ποτήρι = 125 ml)                                         | 1 | 2 | 3 | 4 | 5 | 6 |
| DQ_66 Μπύρα (1 ποτήρι = 240 ml)                                         | 1 | 2 | 3 | 4 | 5 | 6 |
| DQ_67 Άλλο είδος αλκοόλ (1 ποτό)                                        | 1 | 2 | 3 | 4 | 5 | 6 |
| DQ_68 Αναψυκτικά (1 κουτί ~ 330 ml)                                     | 1 | 2 | 3 | 4 | 5 | 6 |
| DQ_69 Αναψυκτικά light (1 κουτί ~ 330 ml)                               | 1 | 2 | 3 | 4 | 5 | 6 |
| DQ_70 Καφές, συνολικά (1 φλ. ή ποτήρι)                                  | 1 | 2 | 3 | 4 | 5 | 6 |
| DQ_71 Τσάι, άλλα αφεψήματα (1 φλ)                                       | 1 | 2 | 3 | 4 | 5 | 6 |
| DQ_72 Καφές ζεστός, φίλτρου ή τύπου καπουτσίνο (1<br>φλιτζάνι = 240 ml) | 1 | 2 | 3 | 4 | 5 | 6 |
| DQ_73 Καφές Ελληνικός ή εσπρέσο (1 μικρό φλιτζάνι =<br>40 ml)           | 1 | 2 | 3 | 4 | 5 | 6 |
| DQ_74 Καφές κρύος, Φραπέ ή Φρέντο (1 ποτήρι = 240<br>ml)                | 1 | 2 | 3 | 4 | 5 | 6 |
| DQ_75 Σοκολάτα ρόφημα, ζεστή ή κρύα (1 φλιτζάνι =<br>240 ml)            | 1 | 2 | 3 | 4 | 5 | 6 |



| ΑΠΟΤΙΜΗΣΗ ΔΙΑΤΡΟΦΙΚΩΝ ΣΥΜΠΕΡΙΦΟΡΩΝ     |                                                                               |                  |                           |                           |                     |          |         |
|----------------------------------------|-------------------------------------------------------------------------------|------------------|---------------------------|---------------------------|---------------------|----------|---------|
| Πόσες φορές την εβδομάδα καταναλώνετε; |                                                                               |                  |                           |                           |                     |          |         |
| NH_1                                   | Πρωινό                                                                        | 1  σπάνια        | 2  1-2 φορές/εβδ          | 3  3-5 φορές/εβδ          | 4  σχεδόν κάθε μέρα |          |         |
| NH_3                                   | Πρόγευμα                                                                      | 1  σπάνια        | 2  1-2 φορές/εβδ          | 3  3-5 φορές/εβδ          | 4  σχεδόν κάθε μέρα |          |         |
| NH_4                                   | Μεσημεριανό                                                                   | 1  σπάνια        | 2  1-2 φορές/εβδ          | 3  3-5 φορές/εβδ          | 4  σχεδόν κάθε μέρα |          |         |
| NH_6                                   | Απογευματινό                                                                  | 1  σπάνια        | 2  1-2 φορές/εβδ          | 3  3-5 φορές/εβδ          | 4  σχεδόν κάθε μέρα |          |         |
| NH_7                                   | Βραδινό                                                                       | 1  σπάνια        | 2  1-2 φορές/εβδ          | 3  3-5 φορές/εβδ          | 4  σχεδόν κάθε μέρα |          |         |
| NH_9                                   | Προ του ύπνου                                                                 | 1  σπάνια        | 2  1-2 φορές/εβδ          | 3  3-5 φορές/εβδ          | 4  σχεδόν κάθε μέρα |          |         |
| NH_5                                   | Κατανάλωση αλκοόλ με το Μεσημεριανό γεύμα;                                    |                  | 0 ΟΧΙ                     | 1  κρασί κόκκινο          | 2  κρασί άσπρο      | 3  μπύρα | 4  άλλο |
| NH_8                                   | Κατανάλωση αλκοόλ με το Βραδινό γεύμα;                                        |                  | 0 ΟΧΙ                     | 1  κρασί κόκκινο          | 2  κρασί άσπρο      | 3  μπύρα | 4  άλλο |
| NH_10                                  | Πόση ώρα μετά το βραδινό φαγητό κοιμάστε; Βραδινό ή προ του ύπνου γεύμα (min) |                  |                           |                           |                     |          |         |
| NH_11                                  | Παραλείπετε κάποιο-α γεύματα λόγω φόρτου εργασίας;                            | 1  < 1φορά/3μηνο | 2  1-3 φορές/μήνα         | 3  2-4 φορές/εβδομάδα     | 4  σχεδόν κάθε μέρα |          |         |
| NH_12                                  | Παραλείπετε κάποιο-α γεύματα γιατί θέλετε να χάσετε βάρος;                    | 1  < 1φορά/3μηνο | 2  1-3 φορές/μήνα         | 3  2-4 φορές/εβδομάδα     | 4  σχεδόν κάθε μέρα |          |         |
| NH_13                                  | Παραλείπετε κάποιο-α γεύματα γιατί απλά εκείνη την ώρα δεν πεινάτε;           | 1  < 1φορά/3μηνο | 2  1-3 φορές/μήνα         | 3  2-4 φορές/εβδομάδα     | 4  σχεδόν κάθε μέρα |          |         |
| NH_14                                  | Κατανάλωση τροφής μπροστά στην τηλεόραση                                      | 1  < 1φορά/3μηνο | 2  1-3 φορές/μήνα         | 3  2-4 φορές/εβδομάδα     | 4  σχεδόν κάθε μέρα |          |         |
| NH_15                                  | Κατανάλωση τροφής κάτω από συνθήκες πίεσης (βιασύνη, άγχος)                   | 1  σπάνια        | 2  1-2 φορές την εβδομάδα | 3  3-5 φορές την εβδομάδα | 4  σχεδόν κάθε μέρα |          |         |
| NH_16                                  | Κατανάλωση τροφής ενώ ταυτόχρονα εργάζεστε (όχι σε διάλειμμα)                 | 1  σπάνια        | 2  1-2 φορές την εβδομάδα | 3  3-5 φορές την εβδομάδα | 4  σχεδόν κάθε μέρα |          |         |
| NH_17                                  | Κατανάλωση τροφής ενώ είστε όρθιος ή περπατάτε                                | 1  σπάνια        | 2  1-2 φορές την εβδομάδα | 3  3-5 φορές την εβδομάδα | 4  σχεδόν κάθε μέρα |          |         |
| NH_18                                  | Πόσο συχνά καταναλώνετε κάποιο πιο βαρύ γεύμα που προκαλεί δυσφορία;          | 1  < 1φορά/3μηνο | 2  1-4 φορές/μήνα         | 3  2-4 φορές/εβδομάδα     | 4  σχεδόν κάθε μέρα |          |         |

|       |                                                           |           |                               |                                |                              |
|-------|-----------------------------------------------------------|-----------|-------------------------------|--------------------------------|------------------------------|
| NH_19 | Εσείς είστε υπεύθυνος-η για την προετοιμασία του φαγητού; | 1  σπάνια | 2  μερικές φορές την εβδομάδα | 3  για κάποιο γεύμα της ημέρας | 4  σχεδόν για όλα τα γεύματα |
| NH_20 | Πόσο συχνά τρώτε μόνος-η;                                 | 1  σπάνια | 2  μερικές φορές την εβδομάδα | 3  κάποιο γεύμα της ημέρας     | 4  σχεδόν όλα τα γεύματα     |
